# Supplementary material
Source: HighWire-hosted journal article supplement (https://erj.ersjournals.com/content/56/2/2000268)
Supplement: inline-supplementary-material-1 [file inline-supplementary-material-1.pdf]

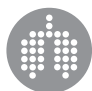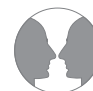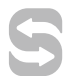

SHAREABLE PDF

# Telomere length in patients with unclassifiable interstitial lung disease: a cohort study

Brett Ley<sup>1,2</sup>, Shuo Liu <sup>1</sup>, Brett M. Elicker<sup>3</sup>, Travis S. Henry<sup>3</sup>, Eric Vittinghoff<sup>4</sup>, Jeffrey A. Golden<sup>1</sup>, Kirk D. Jones<sup>5</sup> and Paul J. Wolters<sup>1</sup>

**Affiliations:** <sup>1</sup>Dept of Medicine, University of California San Francisco, San Francisco, CA, USA. <sup>2</sup>Dept of Pulmonary and Critical Care Medicine, Kaiser Permanente San Francisco, San Francisco, CA, USA. <sup>3</sup>Dept of Radiology and Biomedical Imaging, University of California San Francisco, San Francisco, CA, USA. <sup>4</sup>Dept of Epidemiology and Biostatistics, University of California San Francisco, San Francisco, CA, USA. <sup>5</sup>Dept of Pathology, University of California San Francisco, San Francisco, CA, USA.

**Correspondence:** Brett Ley, 2350 Geary Blvd, San Francisco, CA 94115, USA. E-mail: brett.j.ley@kp.org

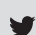

@ERSpublications

**Peripheral blood telomere length predicts survival in patients with unclassifiable interstitial lung disease** <https://bit.ly/3e3j0sL>

**Cite this article as:** Ley B, Liu S, Elicker BM, *et al.* Telomere length in patients with unclassifiable interstitial lung disease: a cohort study. *Eur Respir J* 2020; 56: 2000268 [<https://doi.org/10.1183/13993003.00268-2020>].

This single-page version can be shared freely online.

## To the Editor:

Up to 15% of patients with chronic interstitial lung disease (cILD) will remain clinically unclassifiable (*i.e.* unclassifiable ILD, uILD) despite thorough clinical evaluation and multidisciplinary team discussion (MDT) [1, 2]. This diagnostic uncertainty translates into uncertainty in expected prognosis and initial treatment approach (*e.g.* immunosuppression *versus* anti-fibrotic medications) for patients with uILD, and it often precludes enrolment into clinical trials. Peripheral blood telomere length (TL) is a genomic biomarker that has been associated with prognosis and harm from immunosuppression in IPF [3, 4]. TL has recently been associated with idiopathic pulmonary fibrosis (IPF)-like morphologic features (*i.e.* features of usual interstitial pneumonia, UIP) and reduced survival in other forms of cILD [5–7]. Whether TL demonstrates similar associations in patients with uILD is unknown, but if so, its clinical measurement could reduce diagnostic and therapeutic uncertainty by determining which patients with uILD will have an IPF-like course. The aim of this study was to determine whether TL is associated with clinical features and outcomes in a cohort of patients with uILD.
